# Supplementary material
Source: publisher figshare collection journal article supplement (https://sage.figshare.com/ndownloader/files/23612685)
Supplement: Supplementary file 1 [file 23612685]

## **Appendix 1: CPT and ICD codes**

### *CPT codes*

|        |                                                                                                                                         |
|--------|-----------------------------------------------------------------------------------------------------------------------------------------|
| 26350: | Flexor tendon repair or advancement, single, not in no man's land; primary or secondary without free graft, each tendon                 |
| 26352: | Flexor tendon repair or advancement, single, not in no man's land; secondary with free graft (includes obtaining graft), each           |
| 26356: | Flexor tendon repair or advancement, single, in no man's land; primary, each tendon                                                     |
| 26357: | Flexor tendon repair or advancement, single, in no man's land; secondary, each tendon                                                   |
| 26358: | Flexor tendon repair or advancement, single, in no man's land; secondary with free graft (includes obtaining graft), each               |
| 26860: | Arthrodesis, interphalangeal joint, with or without internal fixation                                                                   |
| 26861: | Arthrodesis, interphalangeal joint, with or without internal fixation; each additional interphalangeal joint                            |
| 26862: | Arthrodesis, interphalangeal joint, with or without internal fixation; with autograft (includes obtaining graft)                        |
| 26863: | Arthrodesis, interphalangeal joint, with or without internal fixation; with autograft (includes obtaining graft), each additional joint |

### *ICD-9 and ICD-10 diagnosis codes*

|           |                                                                 |
|-----------|-----------------------------------------------------------------|
| 727.64:   | Rupture hand/wrist flexor tendons                               |
| 883.2:    | Open wound of finger w/ tendon                                  |
| M66.34:   | Spontaneous rupture of flexor tendons, hand                     |
| M66.341:  | Spontaneous rupture of flexor tendons, right hand               |
| M66.342:  | Spontaneous rupture of flexor tendons, left hand                |
| M66.349   | Spontaneous rupture of flexor tendons, unspecified hand         |
| S61.109A: | Unspecified open wound of unspecified thumb with damage to nail |

Appendix 2a: The association between patient characteristics and available functional outcome after direct zone II FPL repair

|                                     | All patients (n=104) | Outcome data available |                  | P-value           |
|-------------------------------------|----------------------|------------------------|------------------|-------------------|
|                                     |                      | Yes (n=57)             | No (n=47)        |                   |
| <b>Age in years, median (IQR)</b>   | 34.9 (26.3-48.2)     | 38.2 (27.4-48.8)       | 32.9 (22.9-47.4) | 0.11 <sup>a</sup> |
| <b>Male sex, n (%)</b>              | 73 (70)              | 36 (49)                | 37 (51)          | 0.09 <sup>b</sup> |
| <b>Race, n (%)<sup>*</sup></b>      |                      |                        |                  | 0.36 <sup>b</sup> |
| Caucasian                           | 72 (73)              | 35 (49)                | 37 (51)          |                   |
| Other                               | 26 (27)              | 16 (62)                | 10 (38)          |                   |
| <b>Smoking, n (%)<sup>**</sup></b>  | 34 (36)              | 20 (59)                | 14 (41)          | 0.82 <sup>b</sup> |
| <b>Diabetes, n (%)</b>              | 6 (5.8)              | 4 (67)                 | 2 (33)           | 0.69 <sup>b</sup> |
| <b>Workers' compensation, n (%)</b> | 8 (7.7)              | 3 (38)                 | 5 (62)           | 0.46 <sup>b</sup> |

<sup>a</sup>Mann-Whitney U-test; <sup>b</sup>Fisher's exact test; <sup>\*</sup>n=98; <sup>\*\*</sup>n=94

Appendix 2b: The association between injury characteristics and available functional outcome data after direct zone II FPL repair

|                                        | All patients (n=104) | Outcome data available |           | P-value            |
|----------------------------------------|----------------------|------------------------|-----------|--------------------|
|                                        |                      | Yes (n=57)             | No (n=47) |                    |
| <b>Mechanism of injury, n (%)</b>      |                      |                        |           | 0.26 <sup>a</sup>  |
| Sharp                                  | 83 (80)              | 48 (58)                | 35 (42)   |                    |
| Saw                                    | 20 (19)              | 9 (45)                 | 11 (55)   |                    |
| Other                                  | 1 (1.0)              | 0 (0)                  | 1 (100)   |                    |
| <b>Concomitant injury, n (%)</b>       |                      |                        |           |                    |
| Nerve                                  | 67 (64)              | 41 (61)                | 26 (39)   | 0.10 <sup>a</sup>  |
| Arterial                               | 11 (11)              | 6 (55)                 | 5 (45)    | >0.99 <sup>a</sup> |
| <b>Dominant hand affected, n (%)**</b> | 31 (36)              | 19 (61)                | 12 (39)   | >0.99 <sup>a</sup> |
| <b>Number of injured digits, n (%)</b> |                      |                        |           | 0.15 <sup>a</sup>  |
| Thumb only                             | 90 (87)              | 52 (58)                | 38 (42)   |                    |
| >1                                     | 14 (13)              | 5 (36)                 | 9 (64)    |                    |

<sup>a</sup>Fisher's exact test; \*n=87; \*\*n=87
